# Supplementary material for: The LO-BaFL method and ALS microarray expression analysis
Source: PubMed Central journal article supplement (PMC3526454; doi:10.1186/1471-2105-13-244), 2012-09-24

# Normal Distribution of Diseased Samples in CAD Study,After Filters

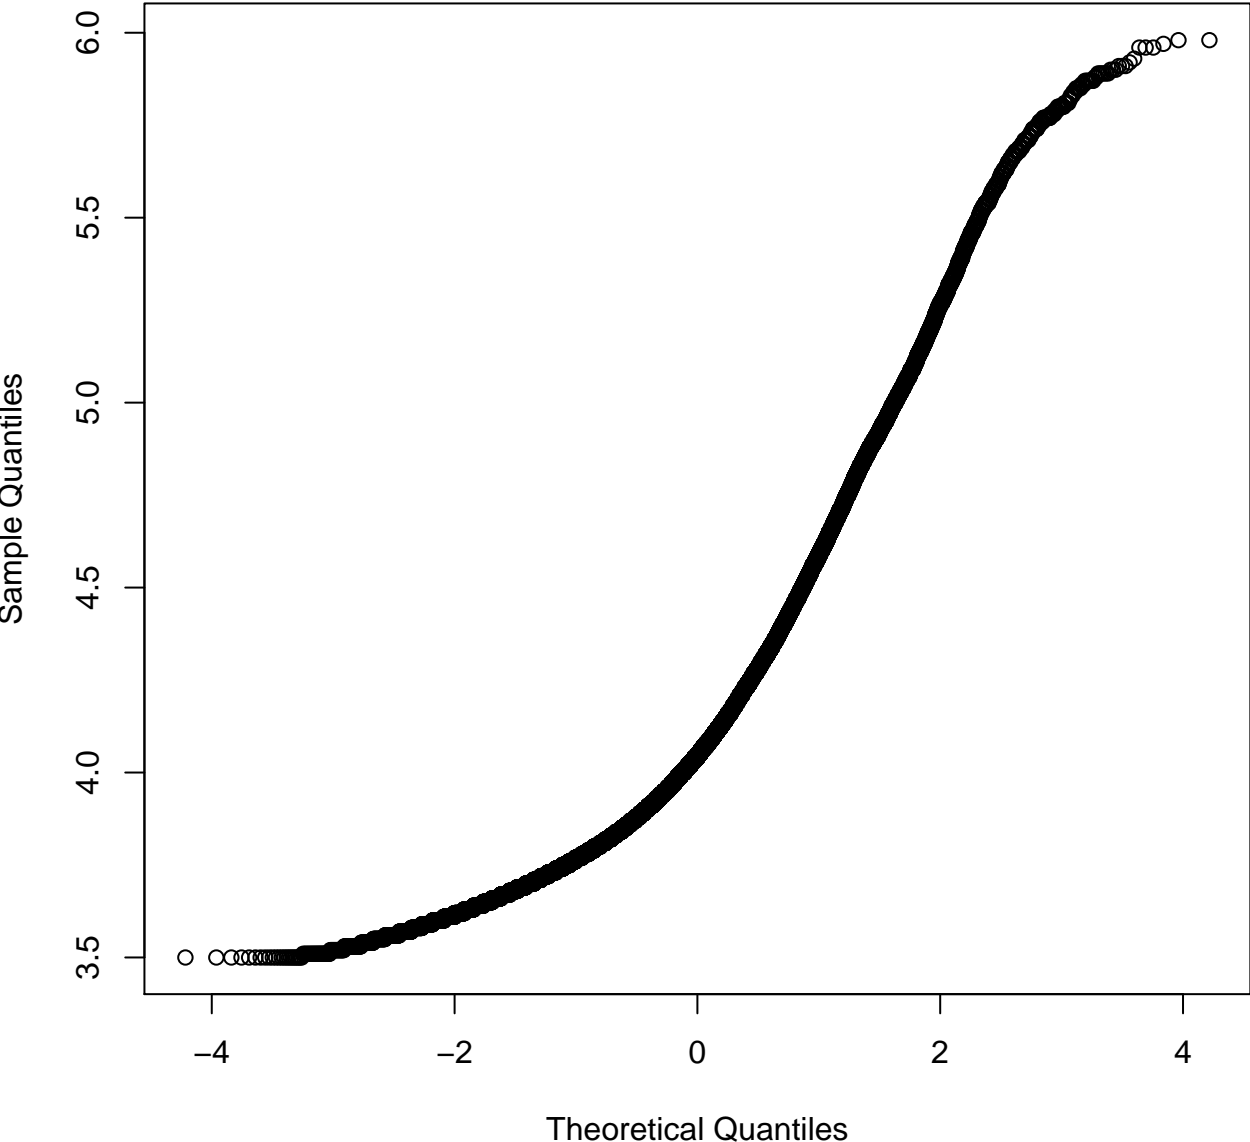

Supplement: 1471-2105-13-244-S1.pdf [file 1471-2105-13-244-S1.pdf]
